# Supplementary material for: Combined protein and calcium β-hydroxy-β-methylbutyrate induced gains in leg fat free mass: a double-blinded, placebo-controlled study
Source: Springer Nature journal article supplement (doi:10.1186/s12970-020-0336-1), 2020-01-03
Supplement: MOESM1 [file 17793782]

**Additional file 1. Table that illustrates the composition of nutritional supplements.**

| <b>Super Carbo, EVOX® Advanced Nutrition</b> | <b>per 100 g</b> | <b>Synergy Whey Protein, EVOX® Advanced Nutrition</b> | <b>per 100 g</b> |
|----------------------------------------------|------------------|-------------------------------------------------------|------------------|
| <i>Energy (kJ)</i>                           | 1597             | <i>Energy (kJ)</i>                                    | 1433             |
| <i>Macronutrients</i>                        |                  | <i>Macronutrients</i>                                 |                  |
| Protein (g)                                  | 0                | Protein (g)                                           | 75               |
| Carbohydrate (g)                             | 95.5             | Carbohydrate (g)                                      | 3.3              |
| Fat (g)                                      | 0                | Lactose (g)                                           | 1                |
| <i>Carbohydrate composition</i>              |                  | Fat Total (g)                                         | 3.3              |
| Monosaccharides                              | 1.3              | Fat unsaturated Total (g)                             | 2.4              |
| Disaccharides                                | 33.9             | Medium Chain Triglycerides (g)                        | 1                |
| Trisaccharides                               | 5.9              | Mono-unsaturated (g)                                  | 0.48             |
| Higher Saccharides                           | 54.4             | Poly-unsaturated (g)                                  | 0.93             |
| <i>Vitamins and Minerals</i>                 |                  | <i>Amino acid composition</i>                         |                  |
| Potassium Phosphate                          | 0.1              | Non-essential                                         |                  |
| Magnesium Ascorbate                          | 0.08             | Alanine (mg)                                          | 3042             |
| Sodium Chloride                              | 0.5              | Arginine (mg)                                         | 2575             |
| Potassium Citrate                            | 0.15             | Aspartic acid (mg)                                    | 6697             |
| Zinc Gluconate                               | 0.02             | Cystine (mg)                                          | 1005             |
|                                              |                  | Glutamic acid (mg)                                    | 15952            |
|                                              |                  | Essential                                             |                  |
|                                              |                  | Histidine (mg)                                        | 1862             |
|                                              |                  | Isoleucine (mg)                                       | 4174             |
|                                              |                  | Leucine (mg)                                          | 7329             |
|                                              |                  | Lysine (mg)                                           | 6131             |
|                                              |                  | Methionine (mg)                                       | 1950             |
|                                              |                  | Phenylalanine (mg)                                    | 3273             |
|                                              |                  | Threonine (mg)                                        | 4061             |
|                                              |                  | Tryptophane (mg)                                      | 1004             |
|                                              |                  | Valine (mg)                                           | 4593             |
|                                              |                  | Glutamine Peptides (mg)                               | 1000             |
|                                              |                  | Glycine (mg)                                          | 1532             |
|                                              |                  | Proline (mg)                                          | 6586             |
|                                              |                  | Serine (mg)                                           | 4246             |
|                                              |                  | Tyrosine (mg)                                         | 3327             |
|                                              |                  | <i>Minerals</i>                                       |                  |
|                                              |                  | Calcium (mg)                                          | 426              |
|                                              |                  | Magnesium (mg)                                        | 133              |
|                                              |                  | Phosphorous (mg)                                      | 278              |
|                                              |                  | Potassium (mg)                                        | 255              |
|                                              |                  | <i>Other nutrients</i>                                |                  |
|                                              |                  | Essential Phospholipids (mg)                          | 2000             |
