# Supplementary material for: Combined protein and calcium β-hydroxy-β-methylbutyrate induced gains in leg fat free mass: a double-blinded, placebo-controlled study
Source: Springer Nature journal article supplement (doi:10.1186/s12970-020-0336-1), 2020-01-03
Supplement: MOESM3 [file 17793782]

**Additional file 3. Table that illustrates main and interaction the effects of Time and Treatment.**

|                                                                         | <i>df</i> <sub>1</sub> | <i>df</i> <sub>2</sub> | <i>f</i> | <i>P</i> |
|-------------------------------------------------------------------------|------------------------|------------------------|----------|----------|
| <b>FFM</b>                                                              |                        |                        |          |          |
| Time                                                                    | 1                      | 13                     | 38.71    | < 0.001  |
| Group                                                                   | 1                      | 13                     | 0.12     | 0.74     |
| Time x Treatment                                                        | 1                      | 13                     | 1.41     | 0.26     |
| <b>FM%</b>                                                              |                        |                        |          |          |
| Time                                                                    | 1                      | 13                     | 0.47     | 0.51     |
| Group                                                                   | 1                      | 13                     | 0.33     | 0.58     |
| Time x Treatment                                                        | 1                      | 13                     | 0.37     | 0.55     |
| <b>FFM Arm</b>                                                          |                        |                        |          |          |
| Time                                                                    | 1                      | 40                     | 28.97    | < 0.001  |
| Group                                                                   | 1                      | 12                     | 2.83     | 0.12     |
| Time x Treatment                                                        | 1                      | 40                     | 1.69     | 0.2      |
| <b>FFM Leg</b>                                                          |                        |                        |          |          |
| Time                                                                    | 1                      | 40                     | 62.24    | < 0.001  |
| Group                                                                   | 1                      | 12                     | 0.34     | 0.57     |
| Time x Treatment                                                        | 1                      | 40                     | 8.05     | 0.007    |
| <b>Arm CSA<sub>FFM</sub></b>                                            |                        |                        |          |          |
| Time                                                                    | 1                      | 40                     | 56.84    | < 0.001  |
| Group                                                                   | 1                      | 12                     | 1.50     | 0.24     |
| Time x Treatment                                                        | 1                      | 40                     | 1.07     | 0.31     |
| <b>Thigh CSA<sub>FFM</sub></b>                                          |                        |                        |          |          |
| Time                                                                    | 1                      | 37                     | 14.07    | < 0.001  |
| Group                                                                   | 1                      | 11                     | 0.02     | 0.89     |
| Time x Treatment                                                        | 1                      | 37                     | 0.08     | 0.77     |
| <b>Leg press</b>                                                        |                        |                        |          |          |
| Time                                                                    | 1                      | 13                     | 203.25   | < 0.001  |
| Group                                                                   | 1                      | 13                     | 0.004    | 0.95     |
| Time x Treatment                                                        | 1                      | 13                     | 0.71     | 0.41     |
| <b>Bench press</b>                                                      |                        |                        |          |          |
| Time                                                                    | 1                      | 13                     | 256.48   | < 0.001  |
| Group                                                                   | 1                      | 13                     | 0.20     | 0.66     |
| Time x Treatment                                                        | 1                      | 13                     | 0.04     | 0.85     |
| <b><math>\dot{V}O_{2max}</math> ml·min<sup>-1</sup></b>                 |                        |                        |          |          |
| Time                                                                    | 1                      | 13                     | 0.51     | 0.49     |
| Group                                                                   | 1                      | 13                     | 0.10     | 0.75     |
| Time x Treatment                                                        | 1                      | 13                     | 0.002    | 0.96     |
| <b><math>\dot{V}O_{2max}</math> ml·min<sup>-1</sup>·kg<sup>-1</sup></b> |                        |                        |          |          |
| Time                                                                    | 1                      | 13                     | 4.60     | 0.051    |
| Group                                                                   | 1                      | 13                     | 0.10     | 0.76     |
| Time x Treatment                                                        | 1                      | 13                     | 0.01     | 0.91     |

*df*<sub>1</sub>, numerator degrees of freedom *df*<sub>2</sub>; denominator degrees of freedom.
